# Supplementary material for: Can Measurements of Inflammatory Biomarkers Be Used to Spot Respiratory Viral Infections?
Source: MDPI journal article supplement (doi:10.3390/v12101175), 2020-10-17

## IFN- $\gamma$ , P-value

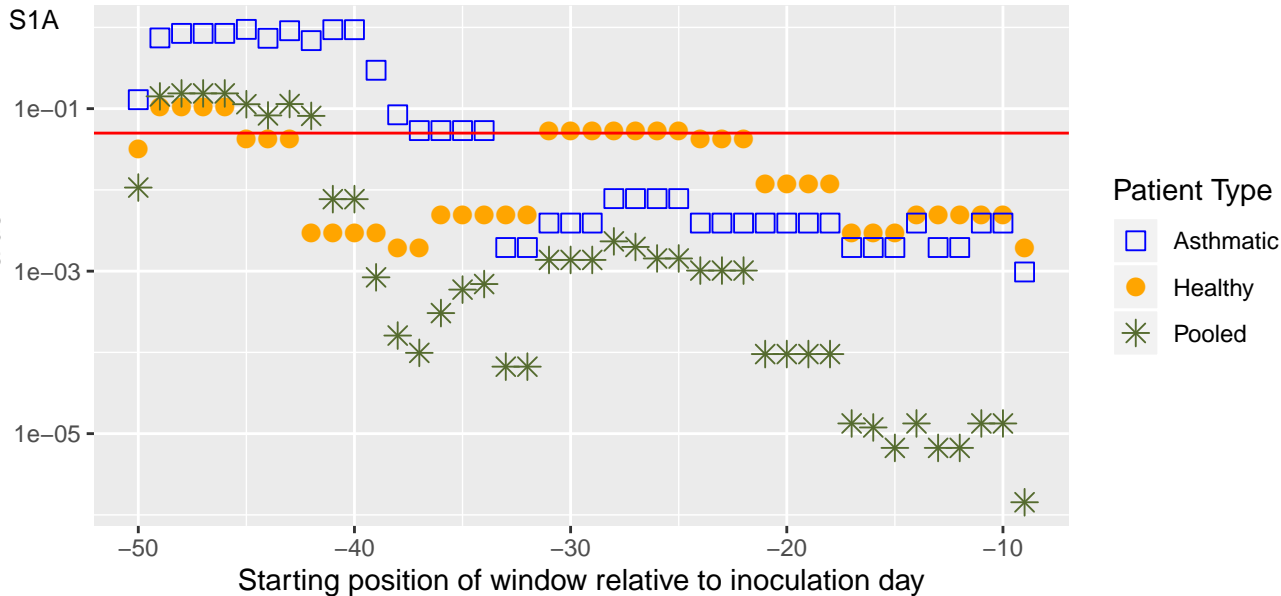

## IFN- $\gamma$ , area under ROC curve

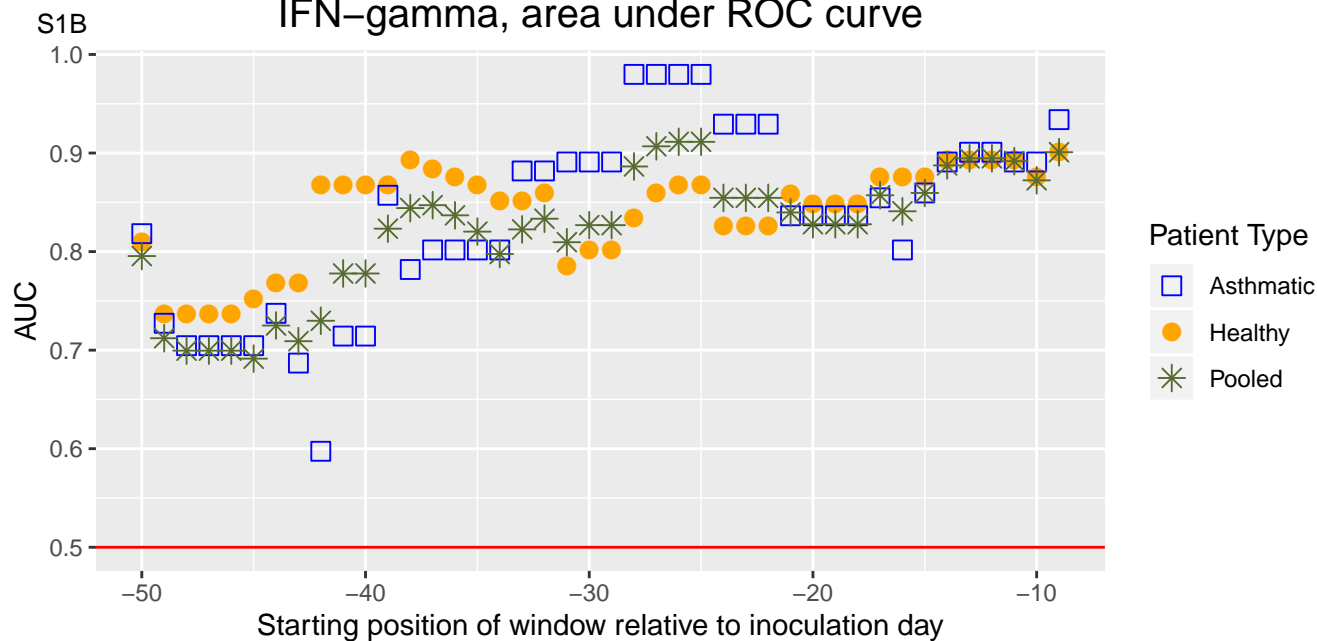

# IL-10, P-value

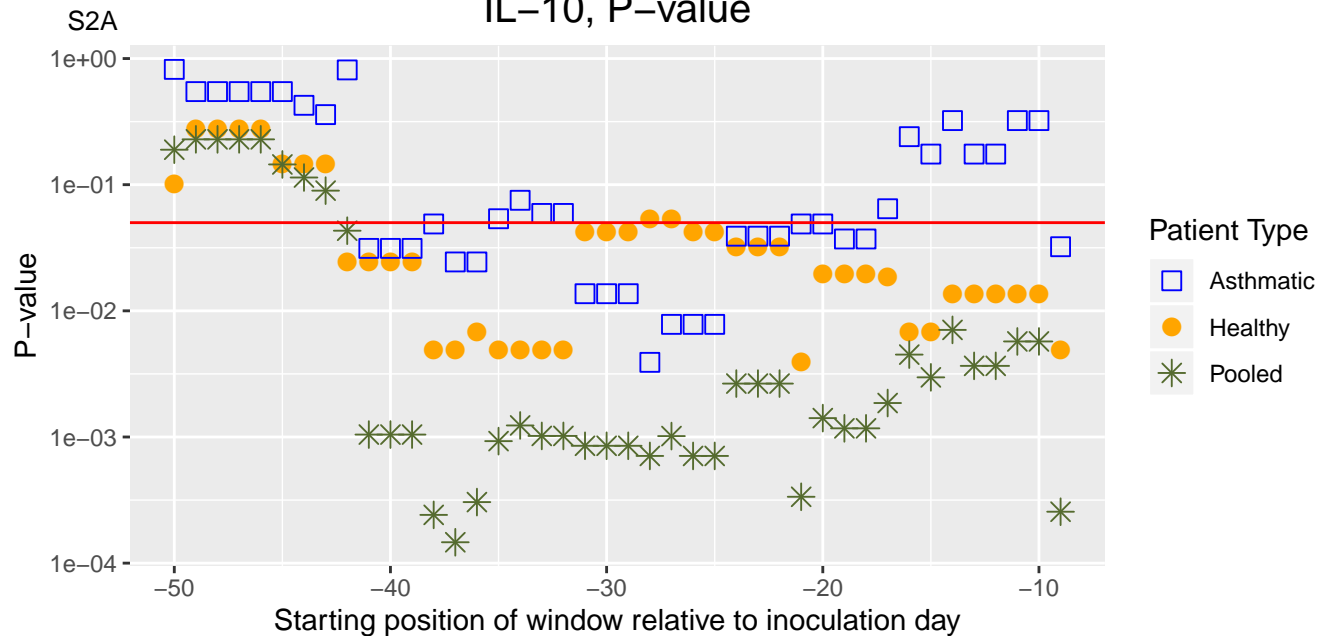

# IL-10, area under ROC curve

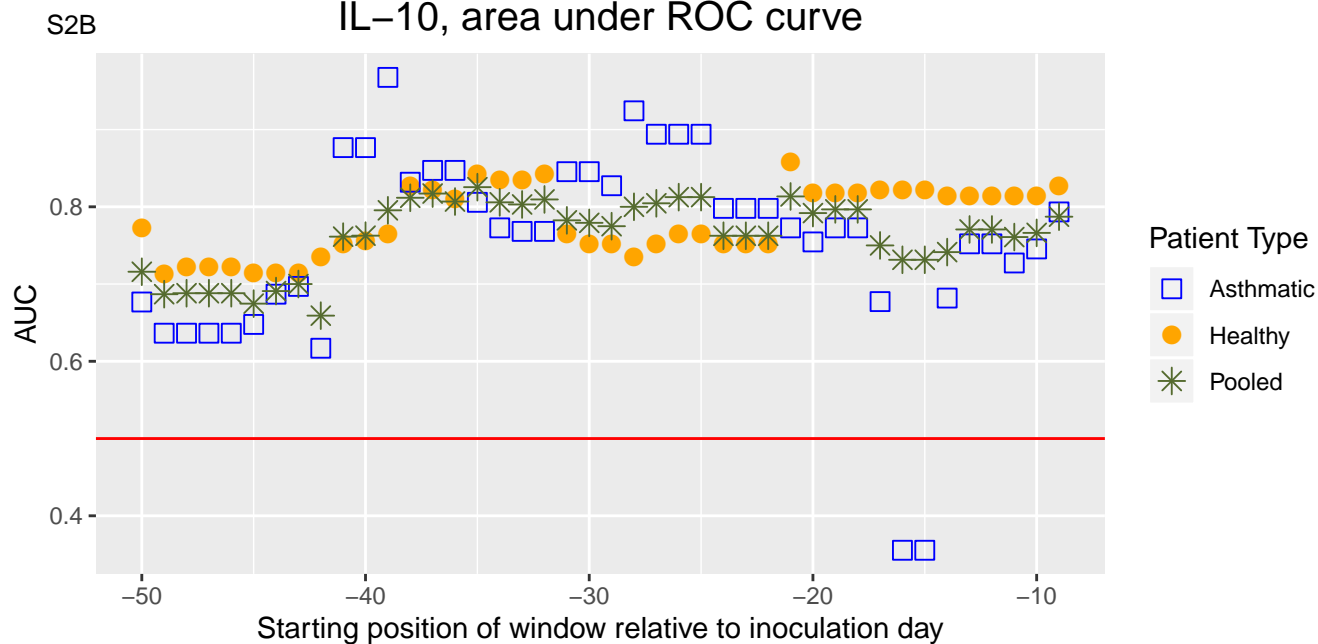

## IL-13, P-value

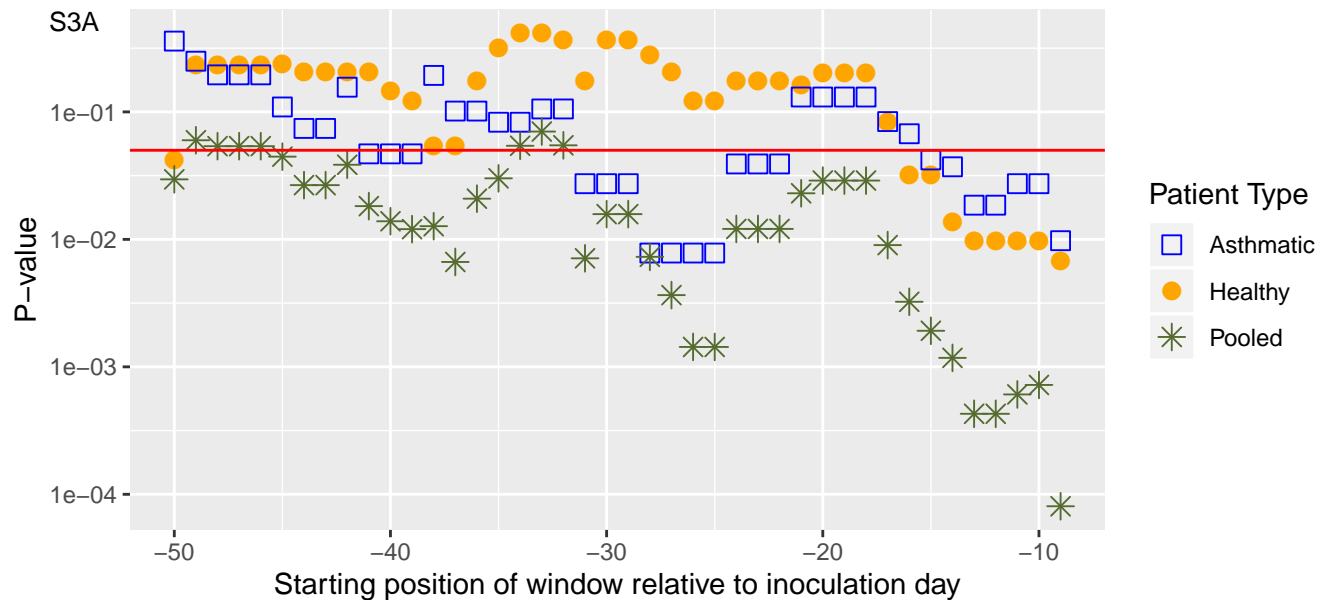

## IL-13, area under ROC curve

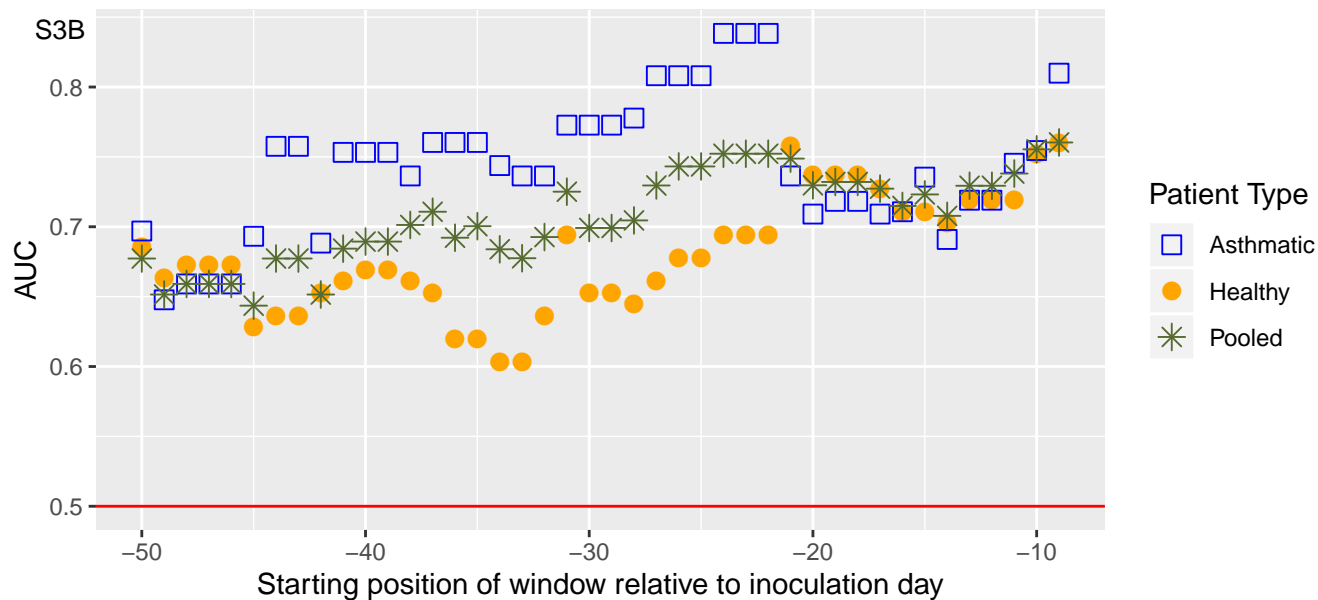

## IL-8, P-value

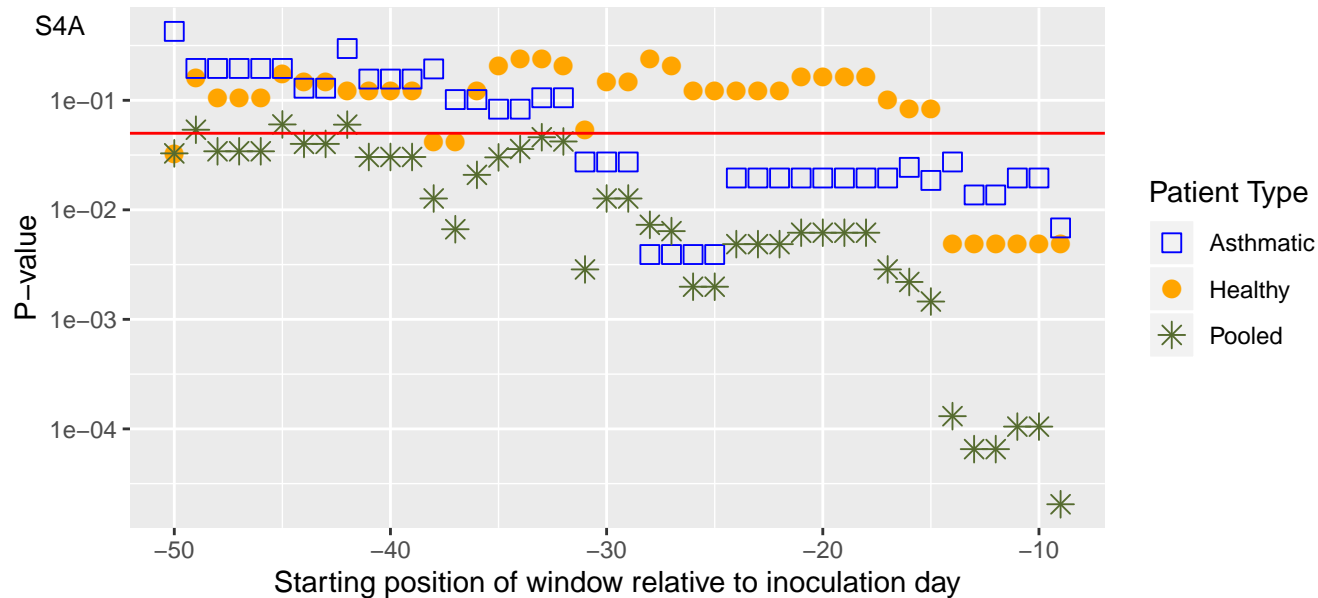

## IL-8, area under ROC curve

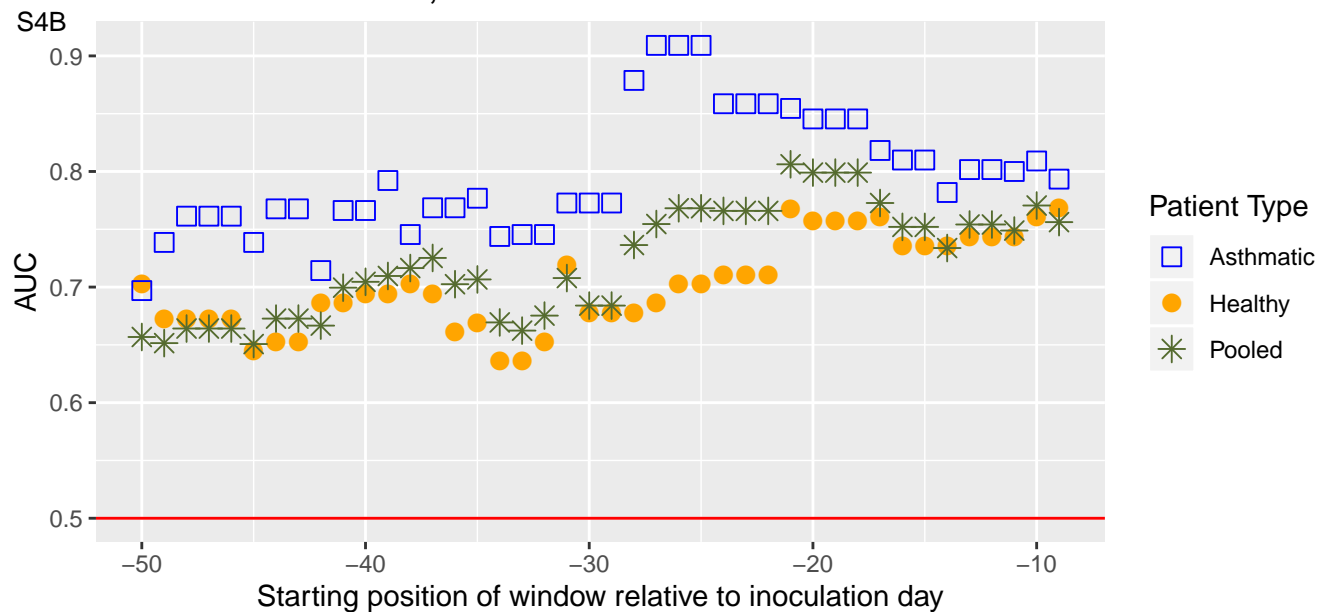

## TNF- $\alpha$ , P-value

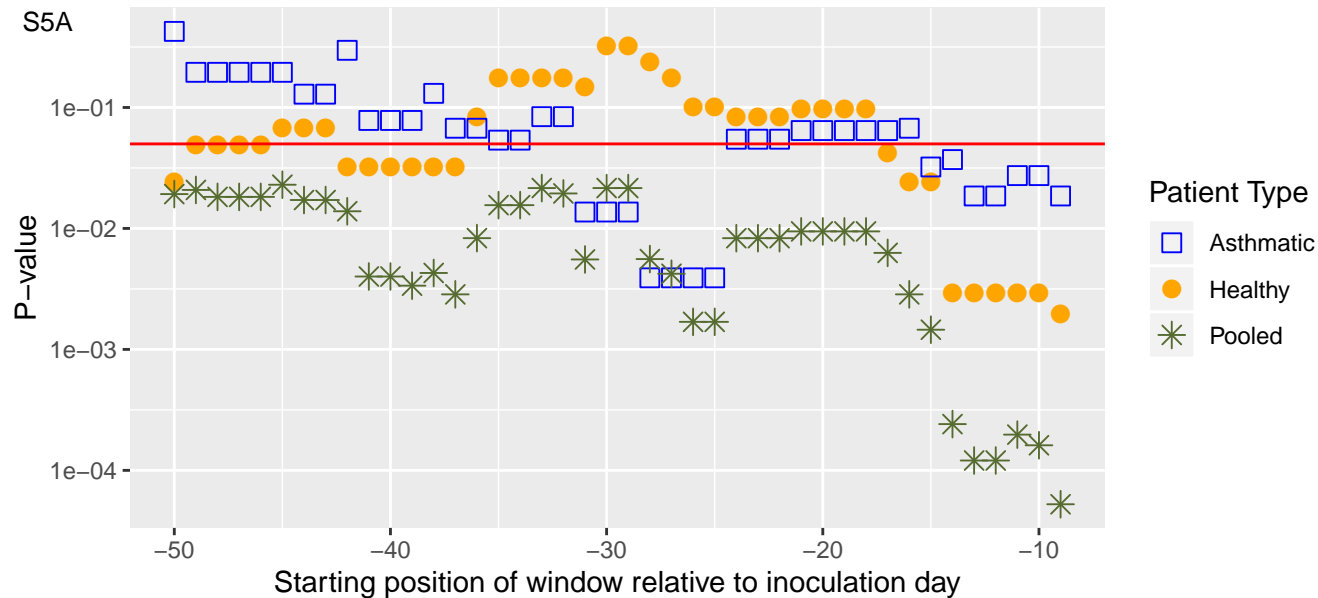

## TNF- $\alpha$ , area under ROC curve

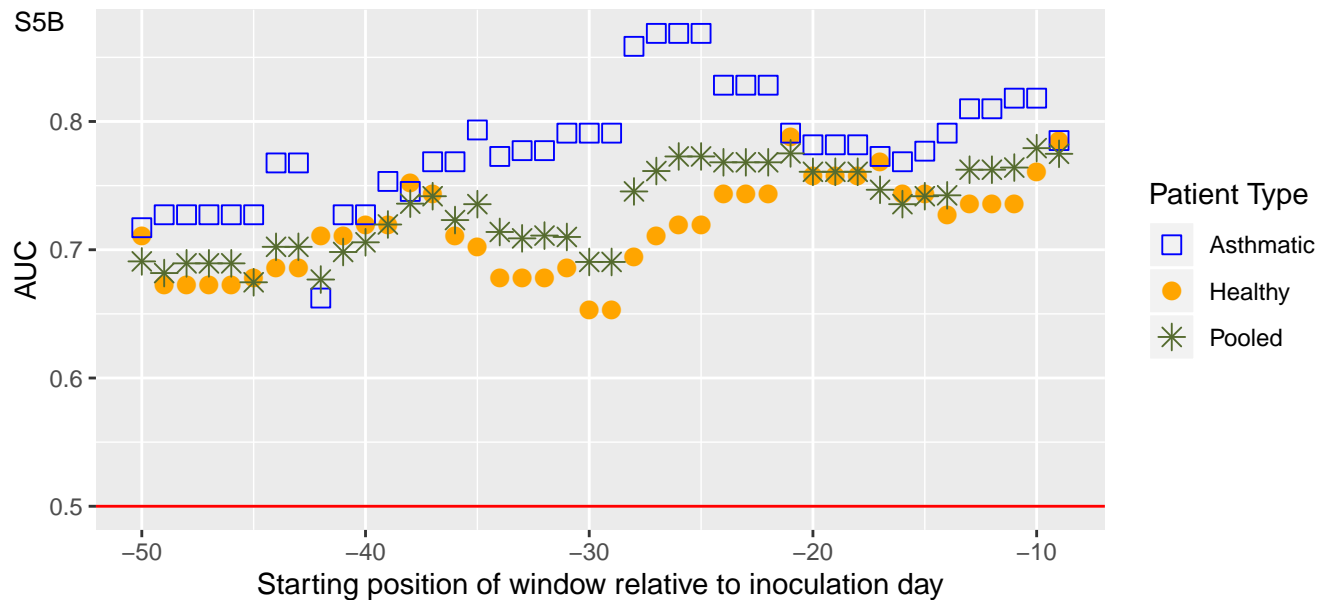

# IP-10, P-value

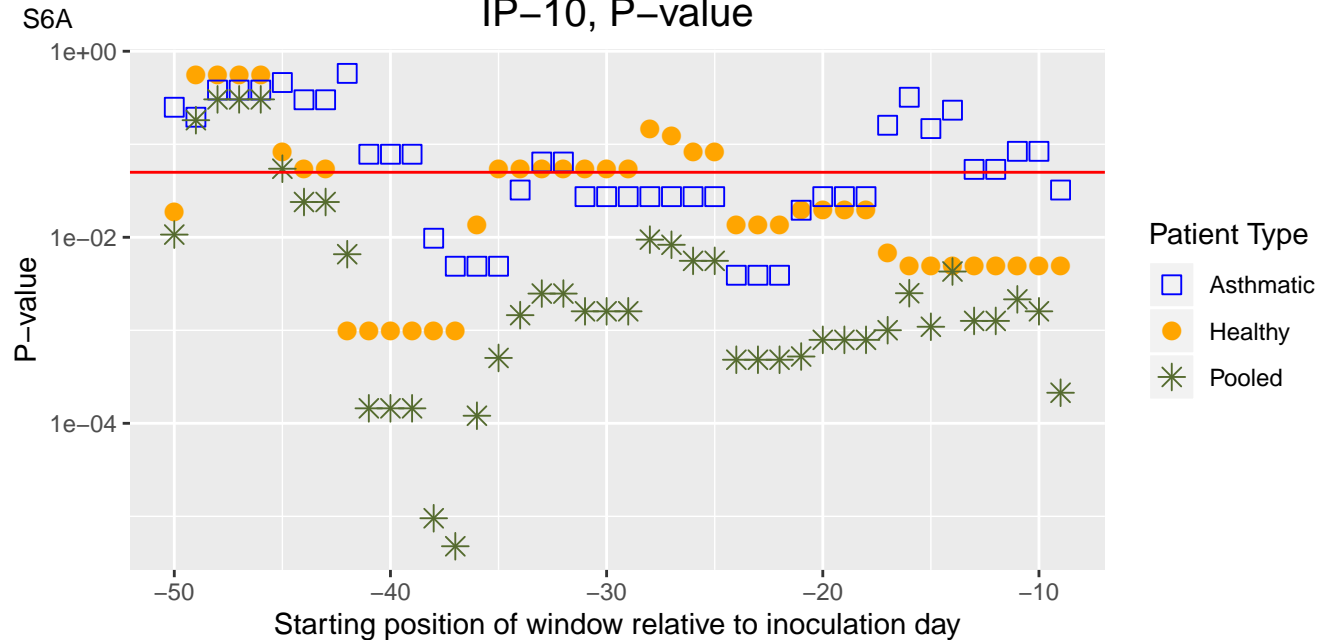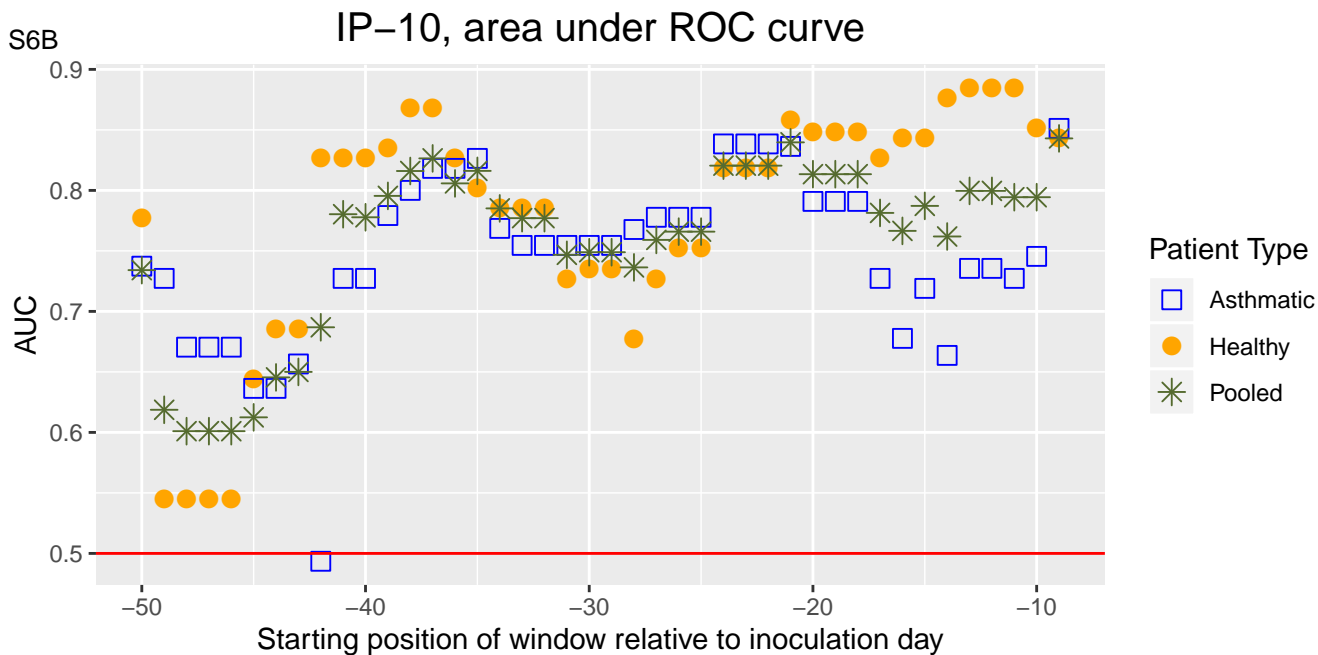

# IL-1b, P-value

S7A

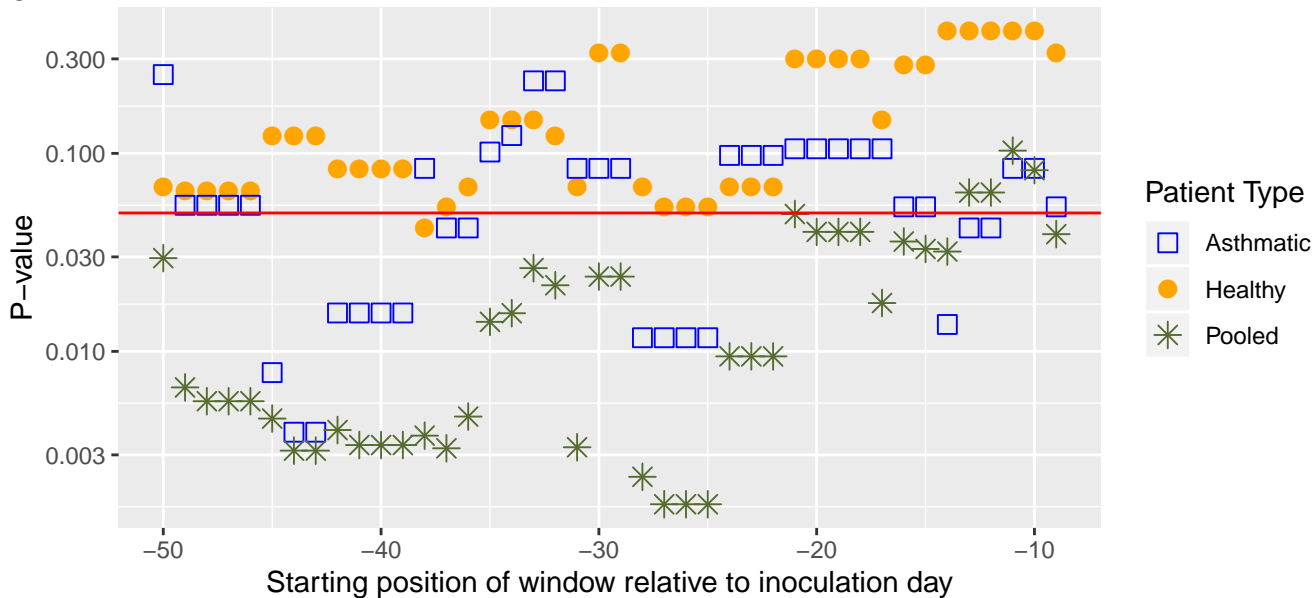

# IL-1b, area under ROC curve

S7B

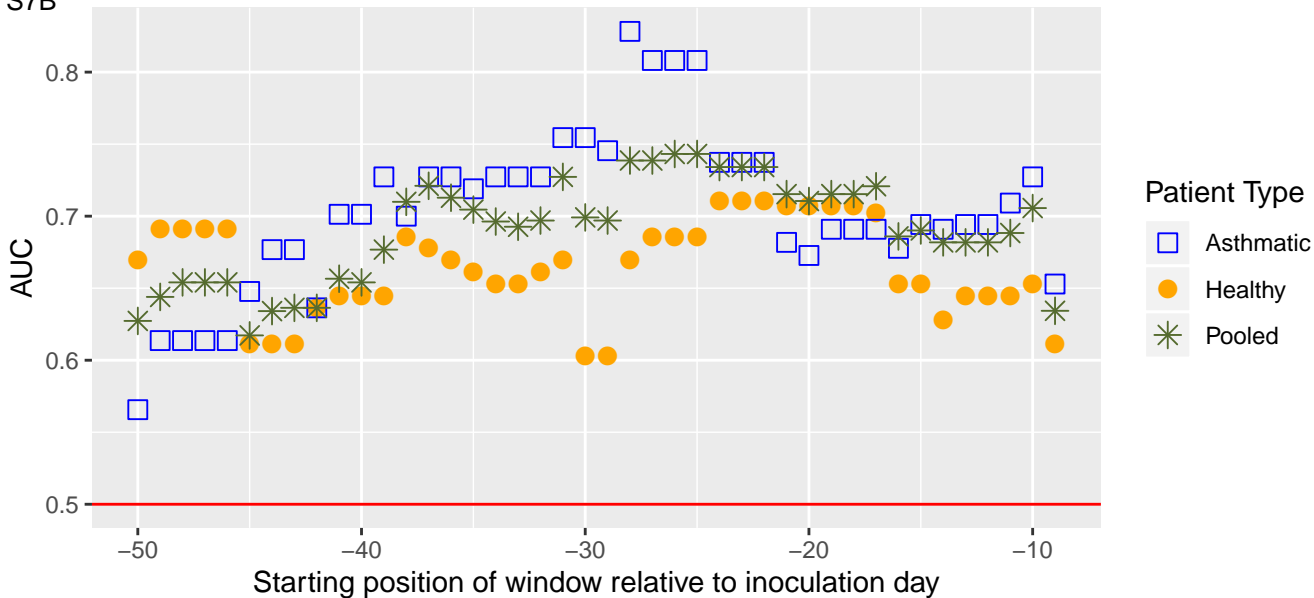

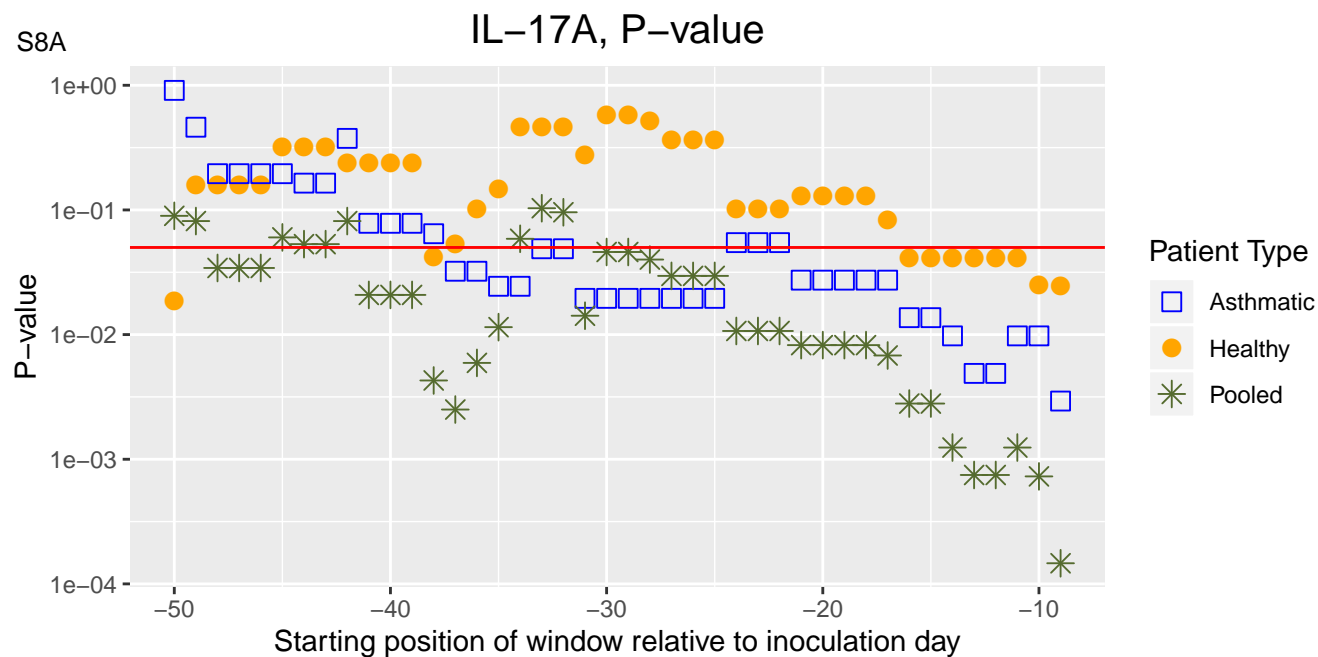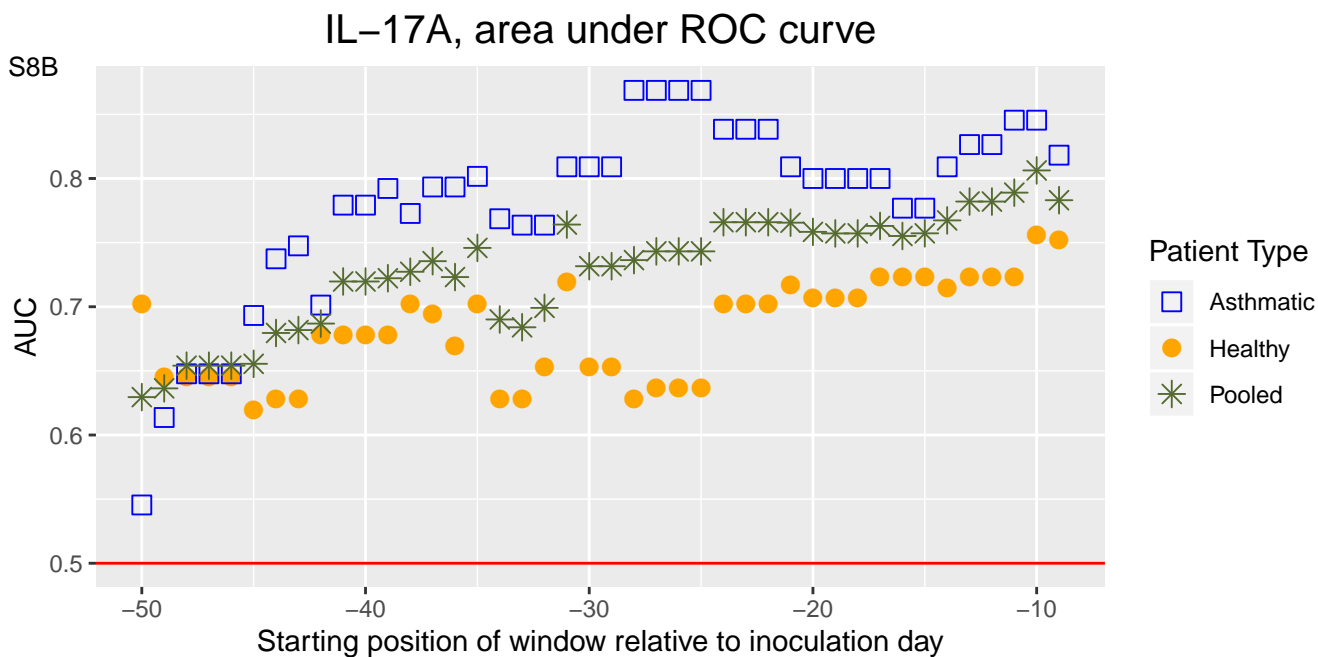



S9A IL-33, P-value

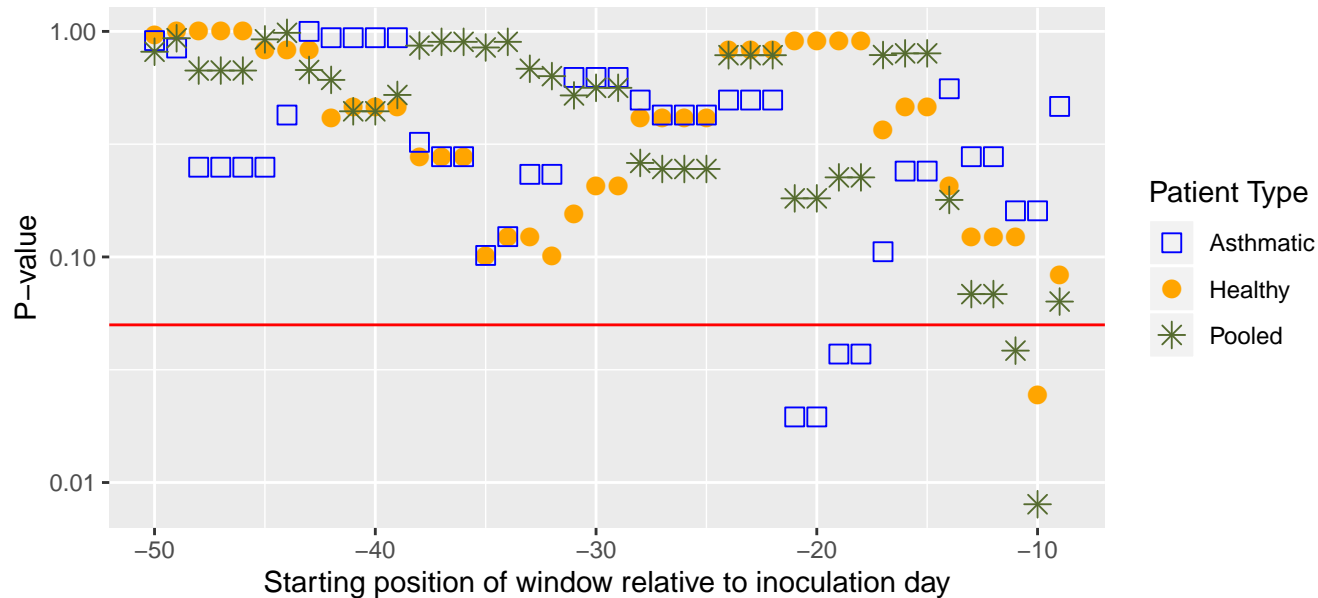

IL-33, area under ROC curve

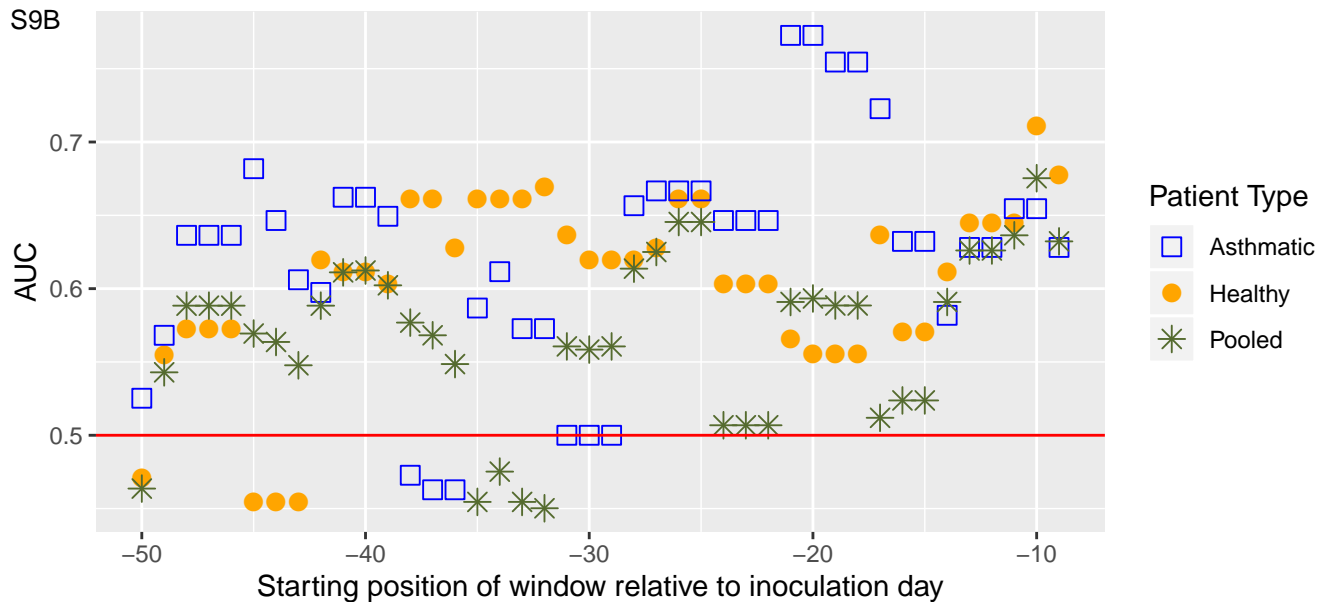

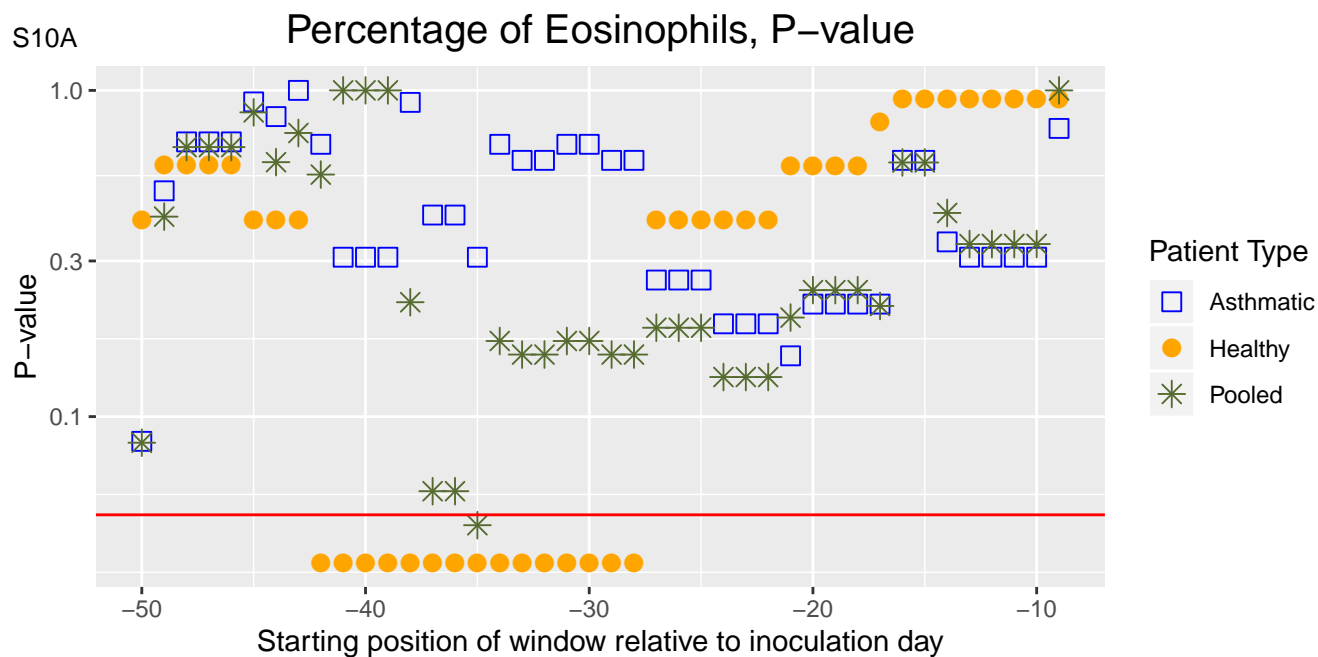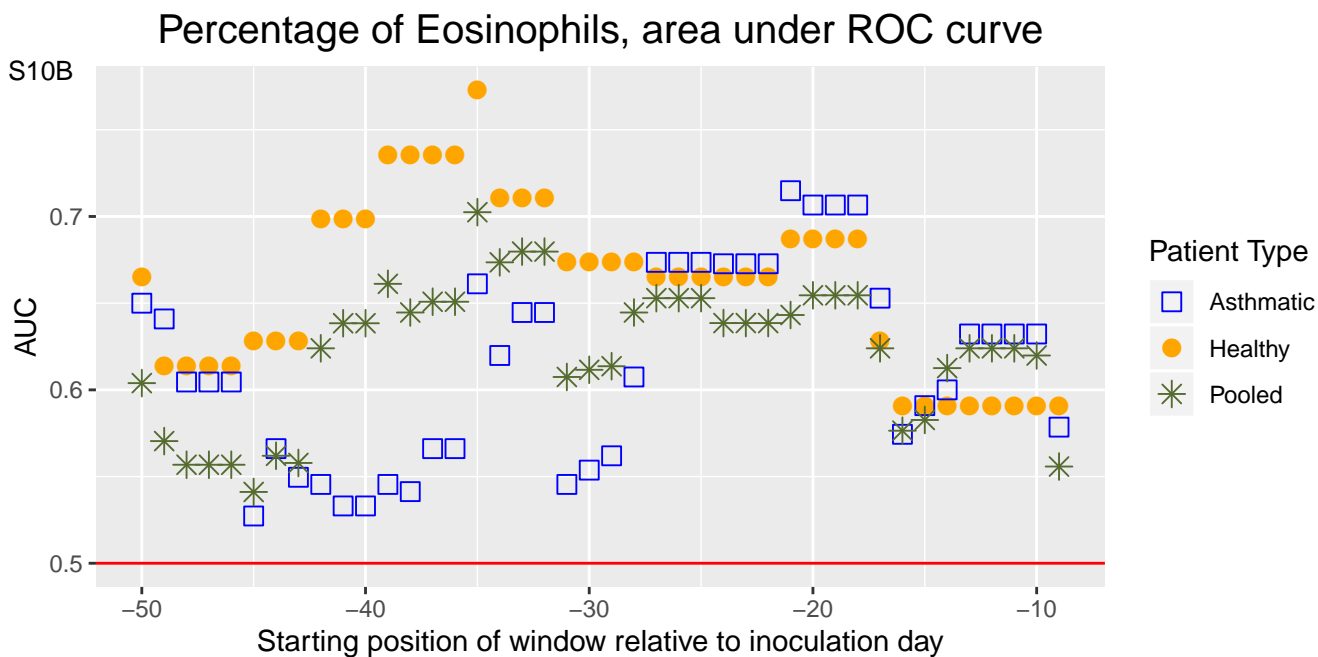

S11A

## Percentage of Neutrophils, P-value

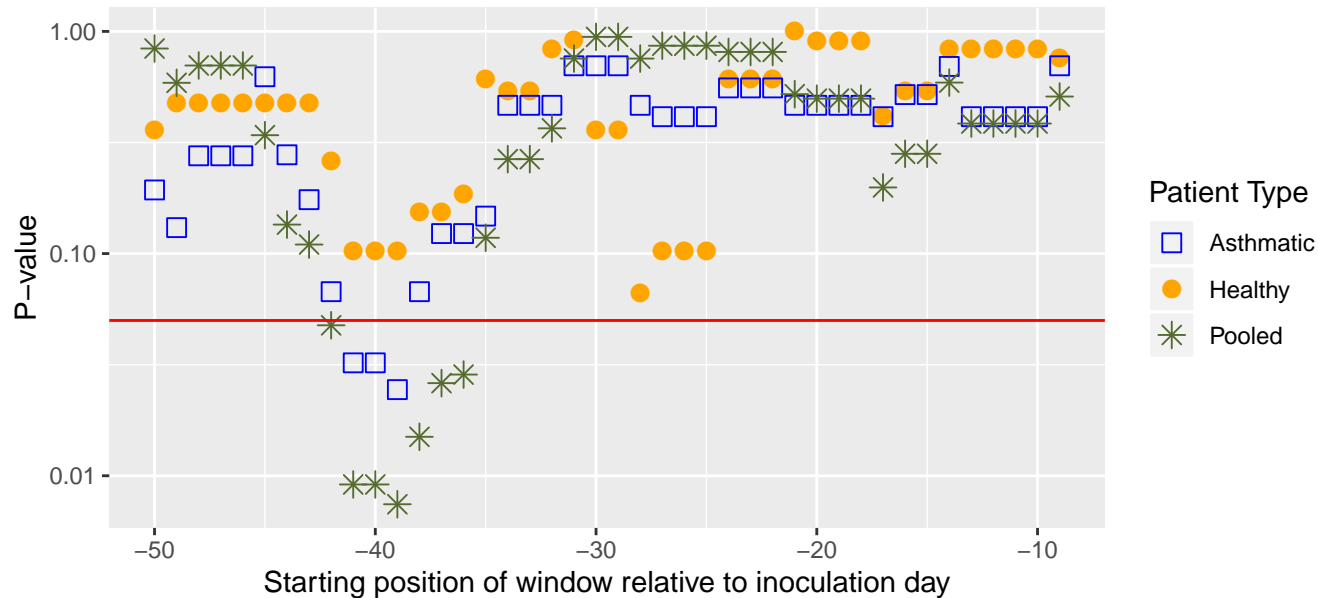

S11B

## Percentage of Neutrophils, area under ROC curve

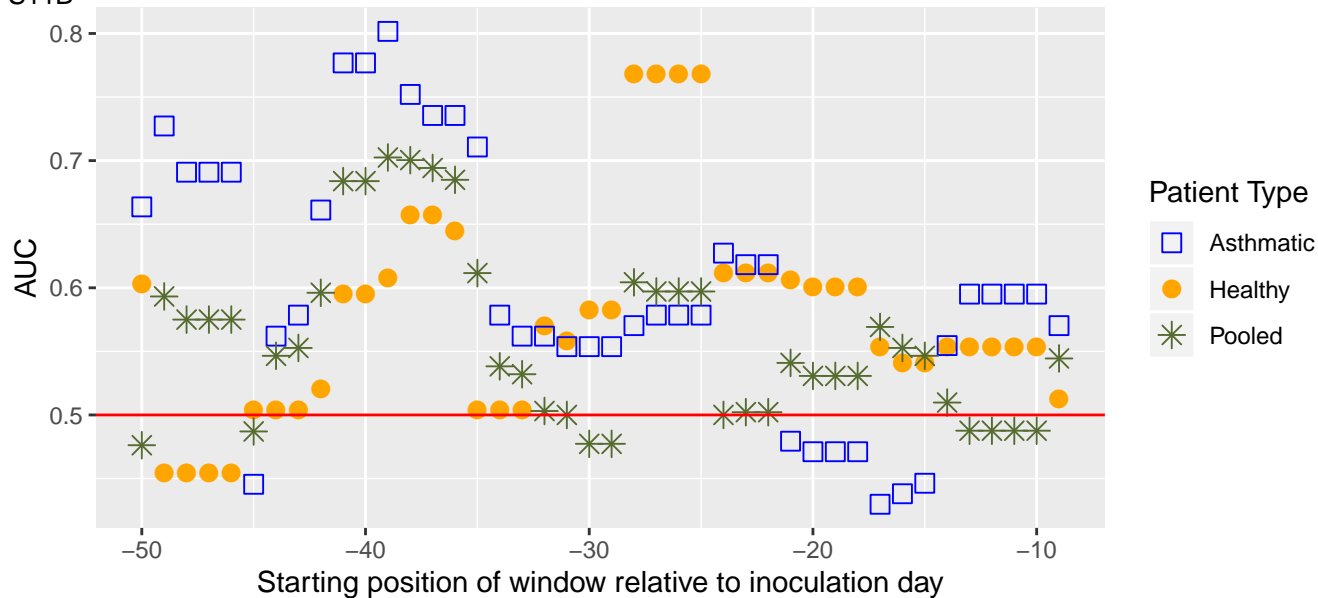

S12A

## Cell density (10e6 per ml), P-value

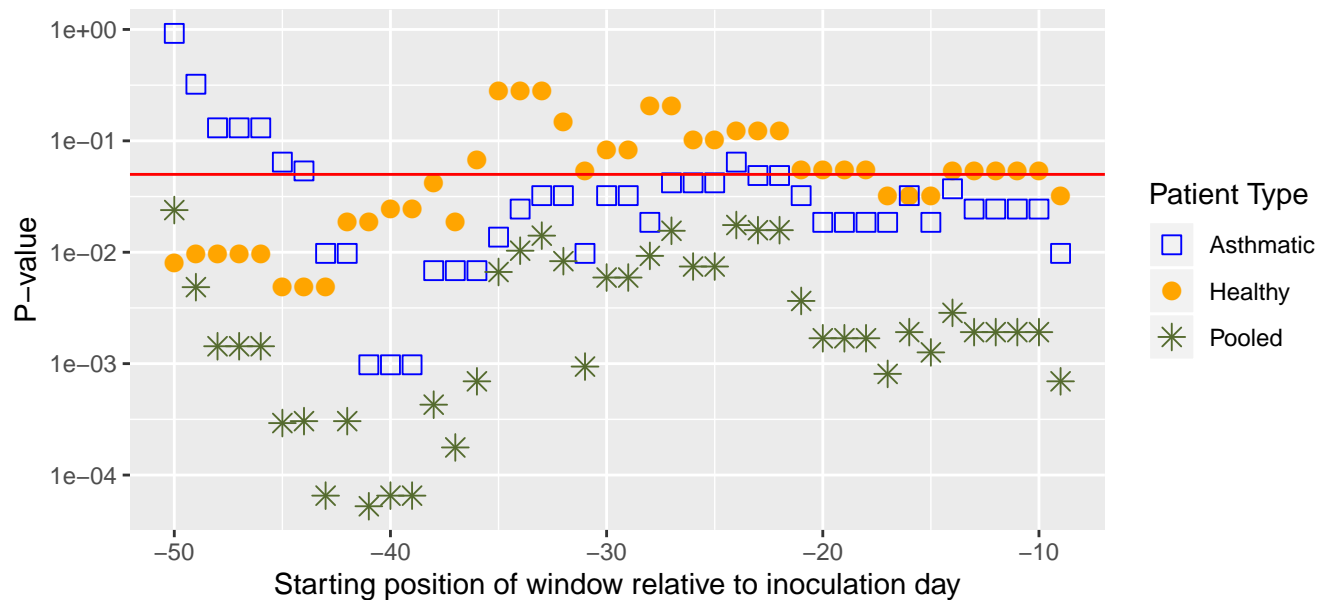

S12B

## Cell density (10e6 per ml), area under ROC curve

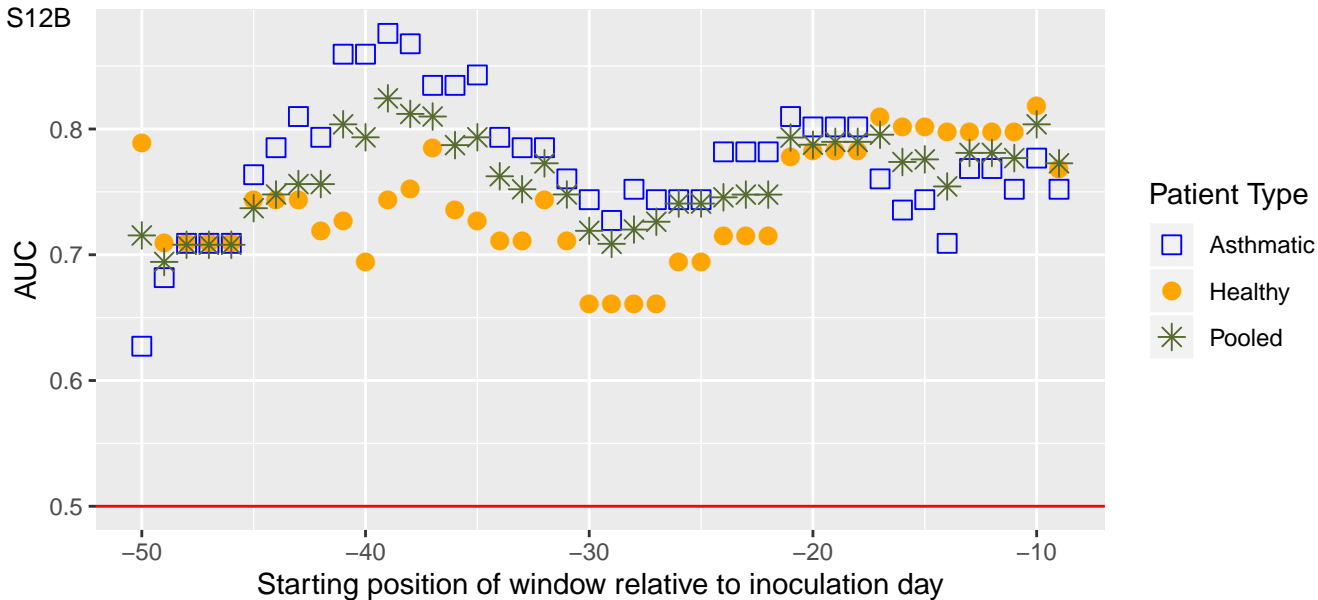

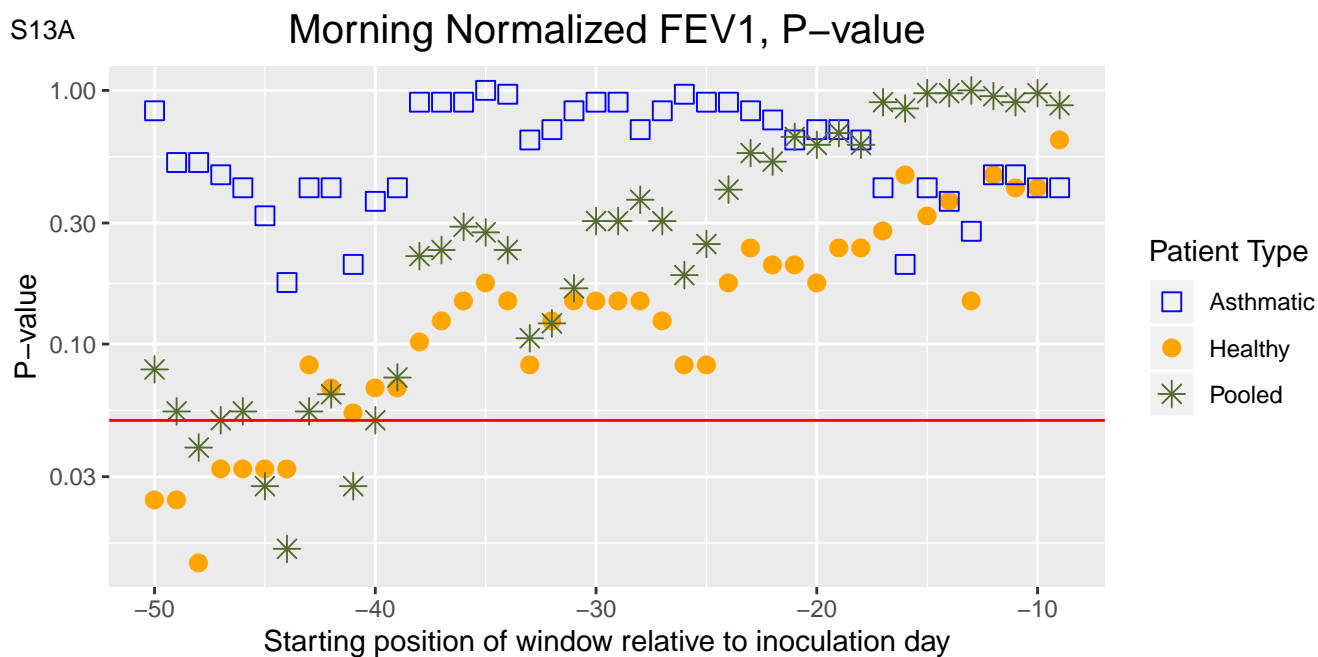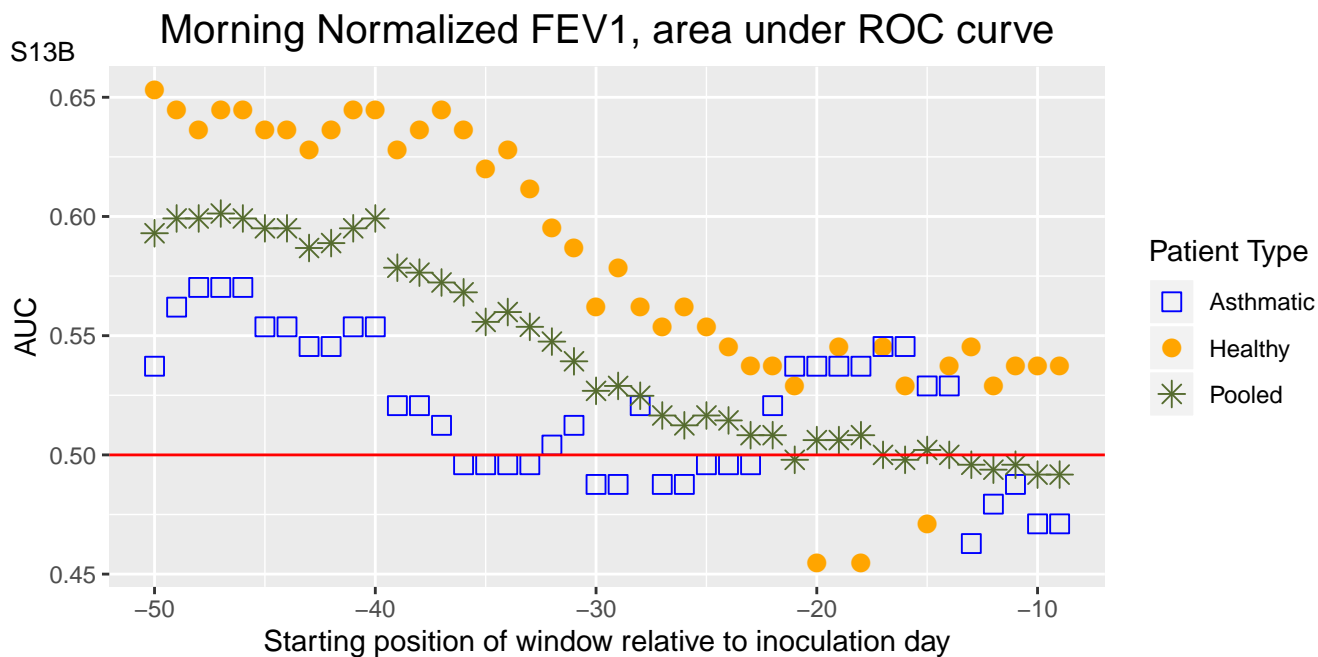

S14A

## Morning Normalized FEV1/FVC, P-value

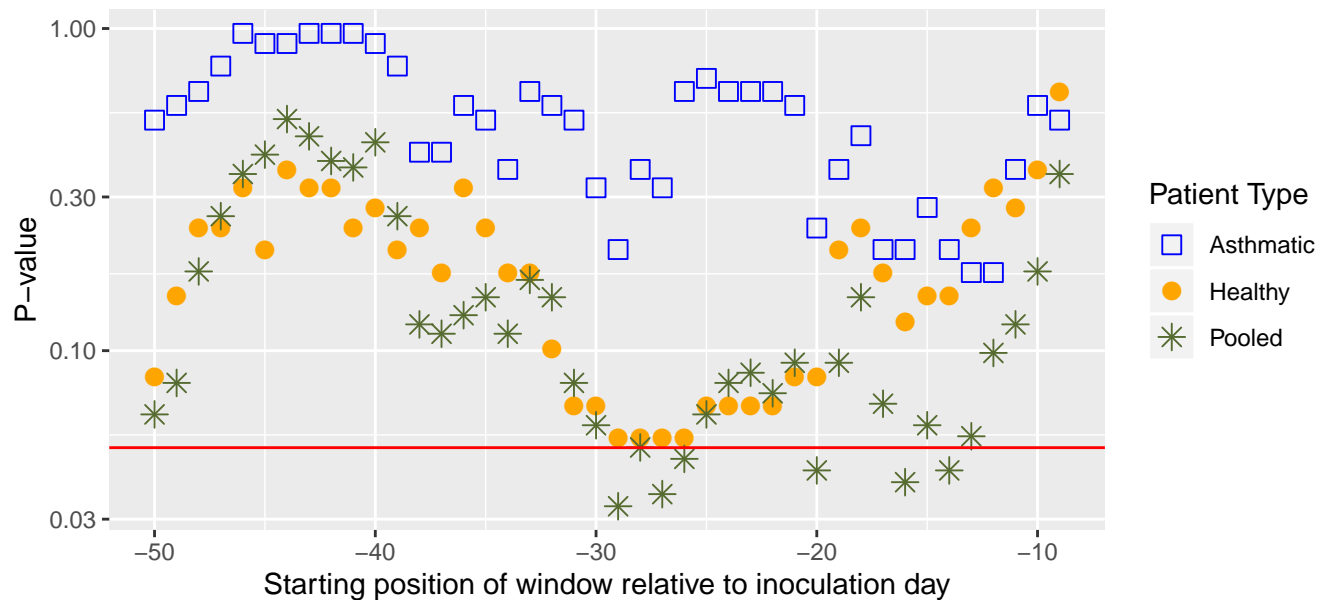

S14B

## Morning Normalized FEV1/FVC, area under ROC curve

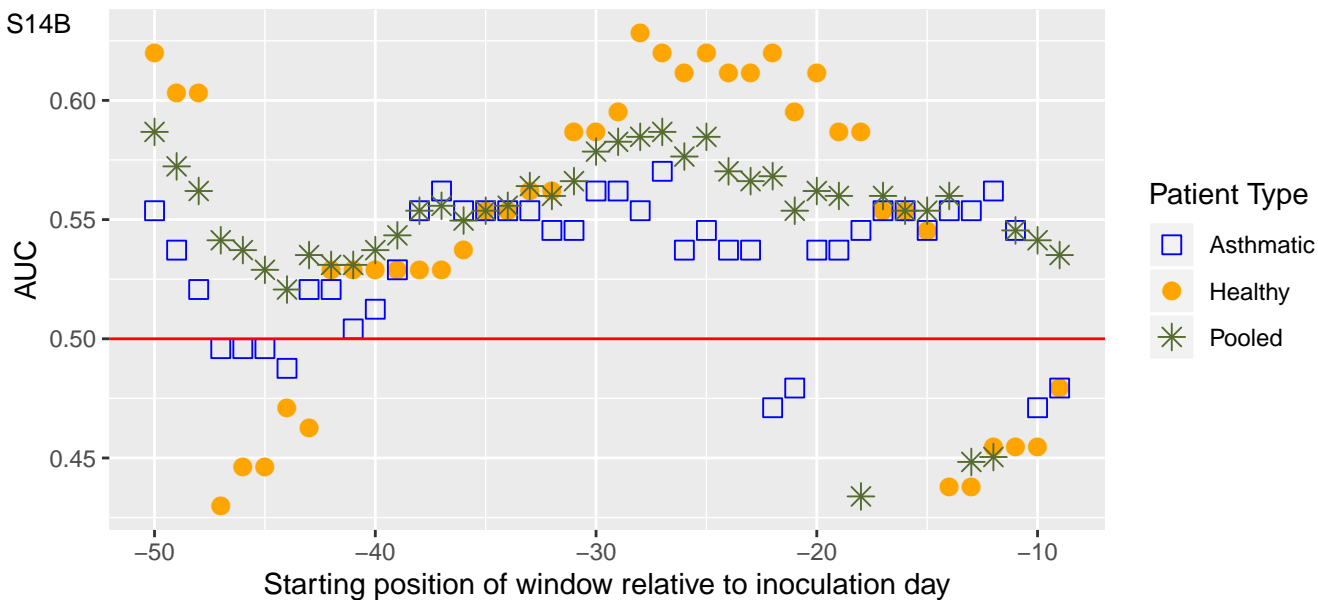

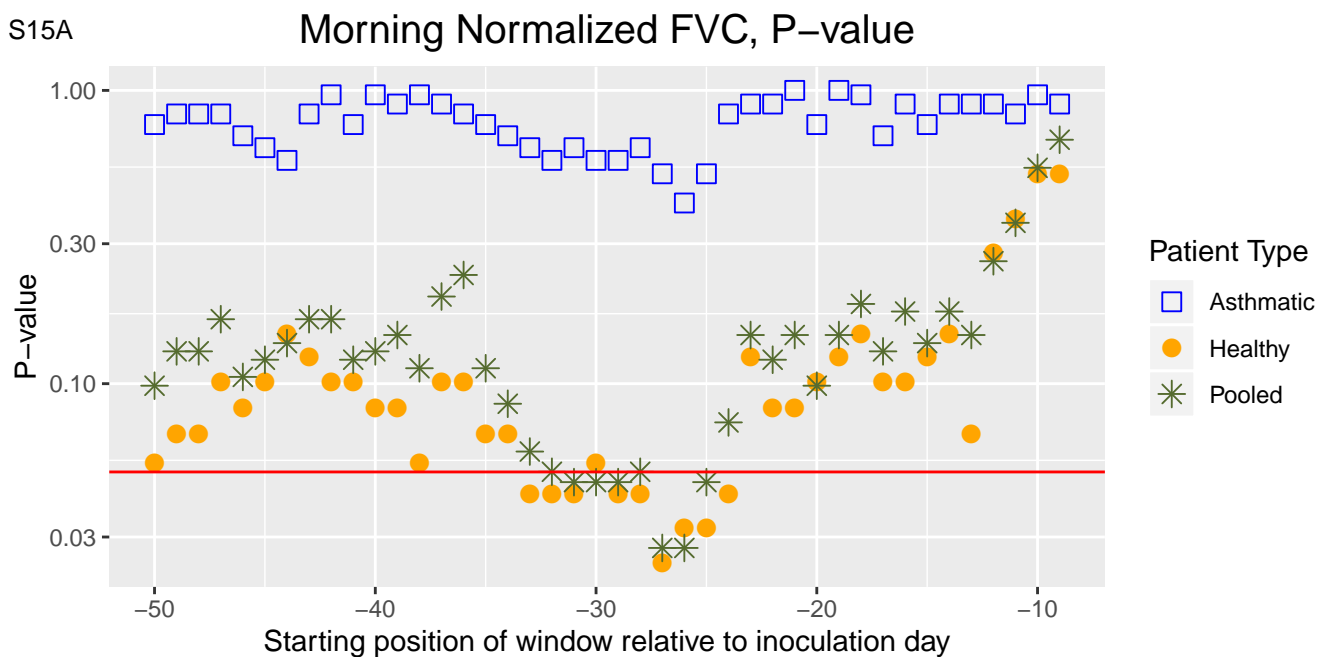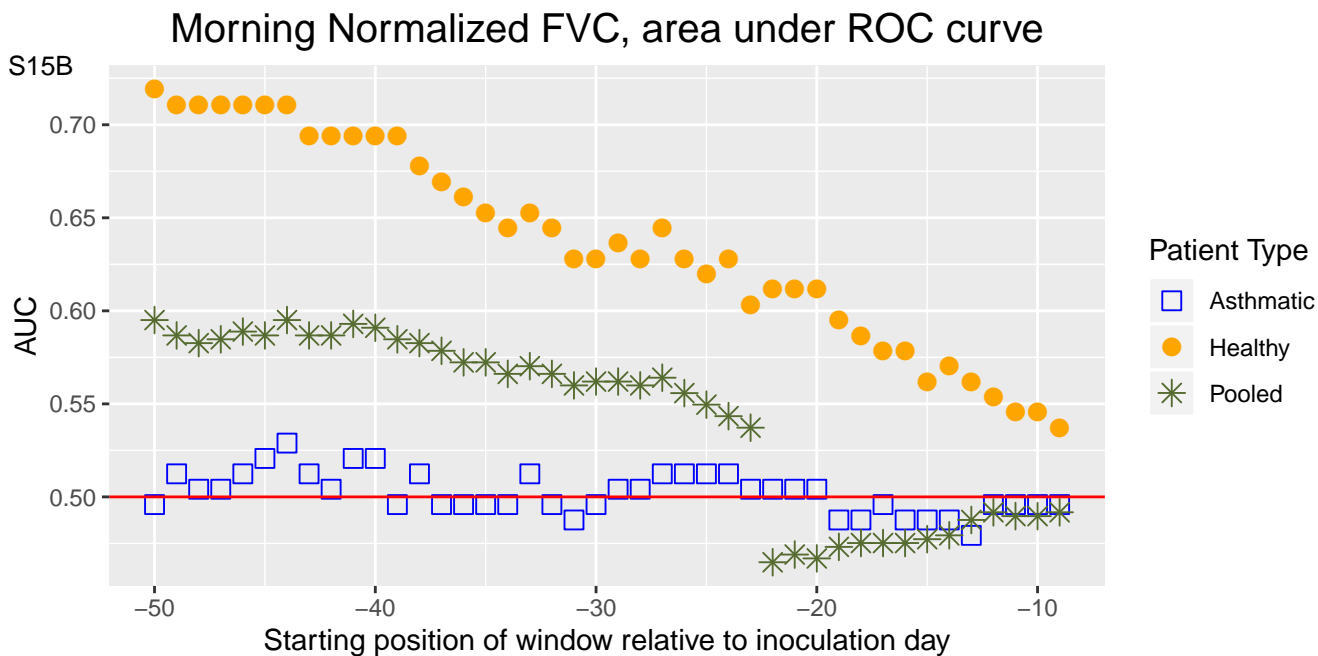

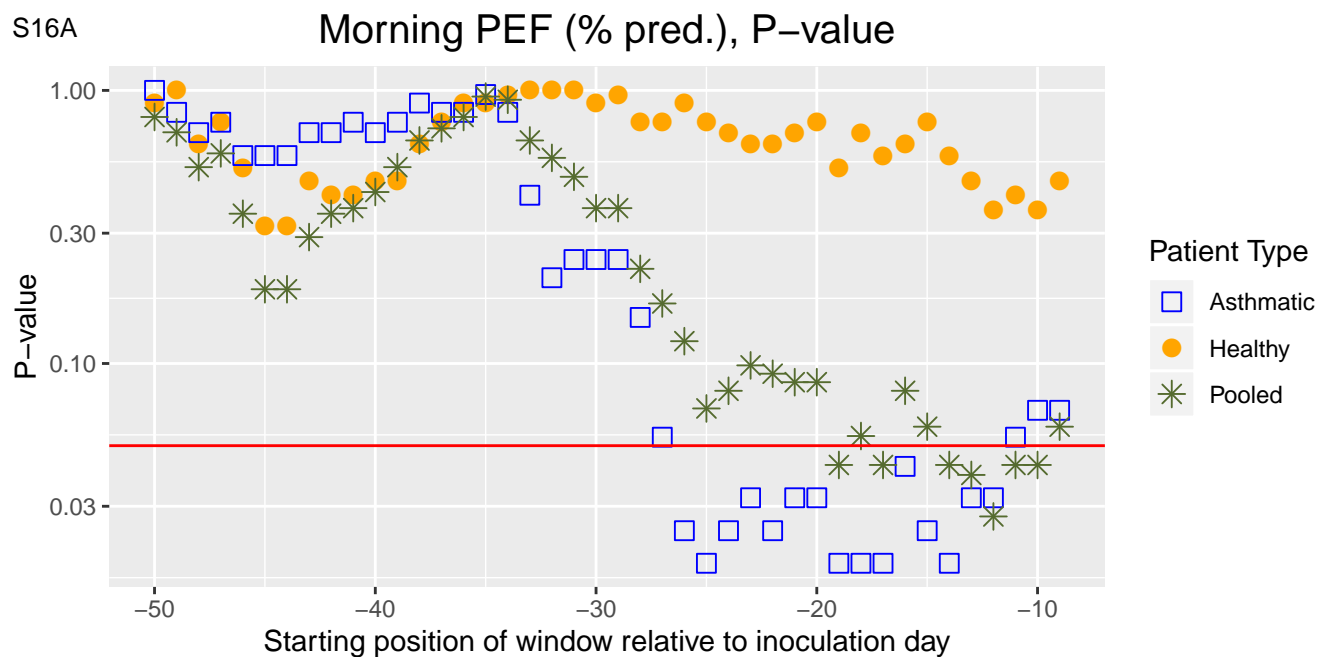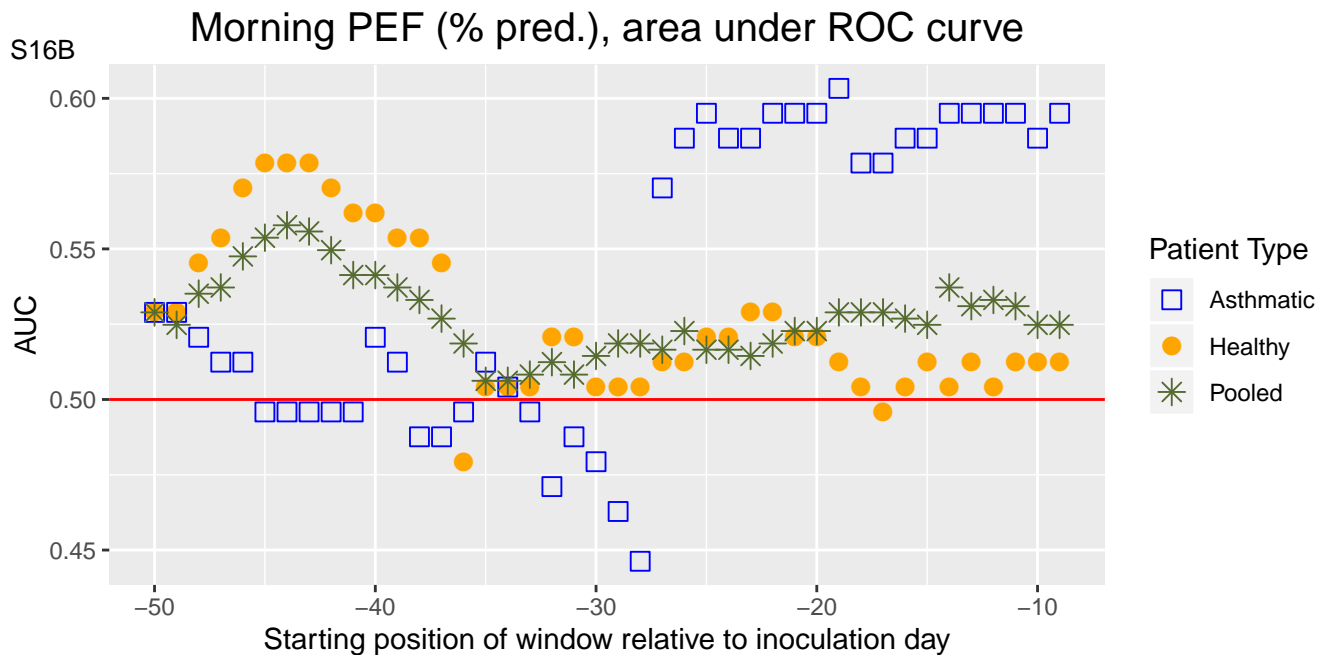



S17A

## Evening Normalized FEV1, P-value

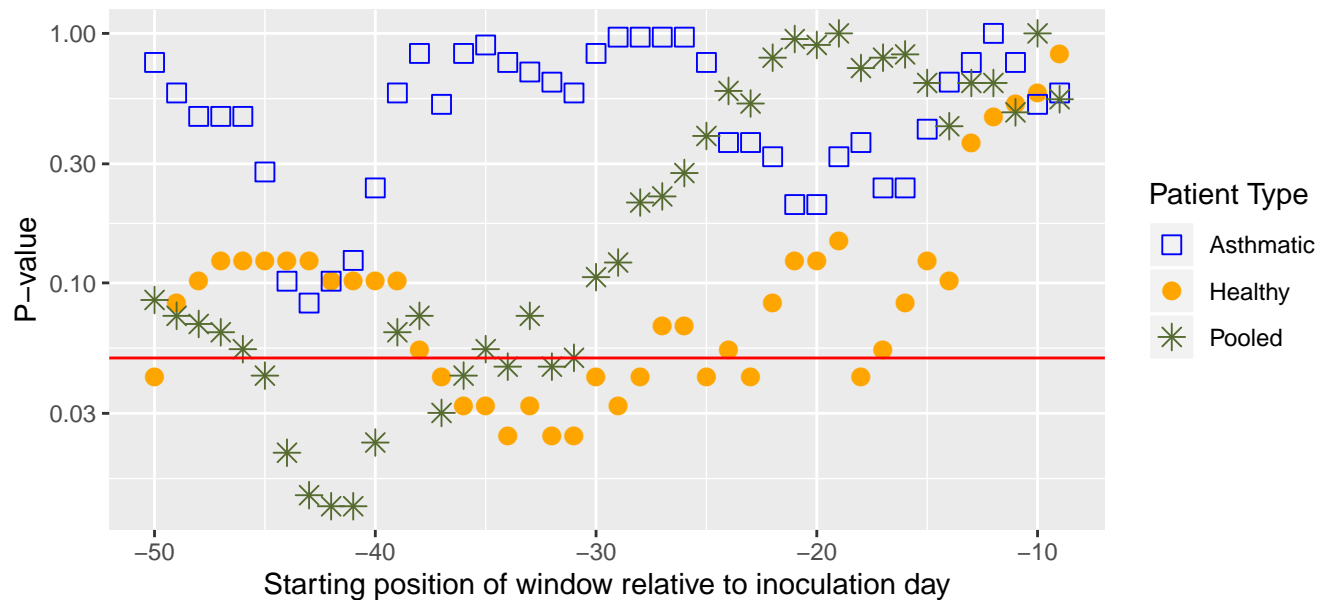

S17B

## Evening Normalized FEV1, area under ROC curve

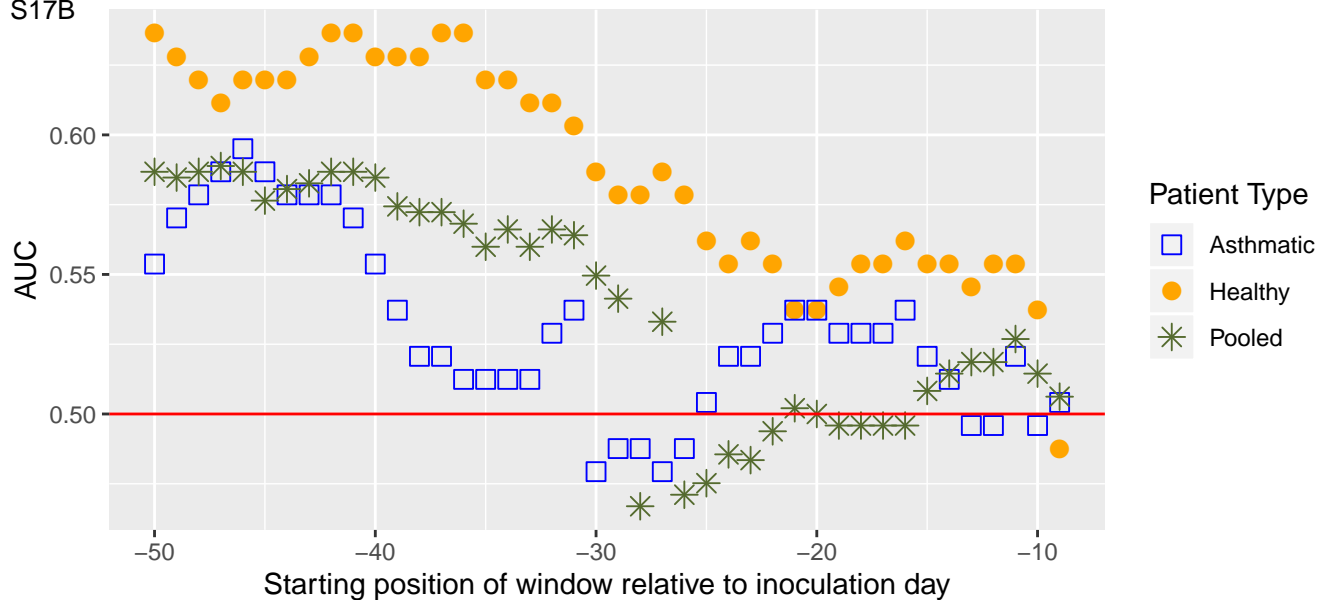

S18A

## Evening Normalized FEV1/FVC, P-value

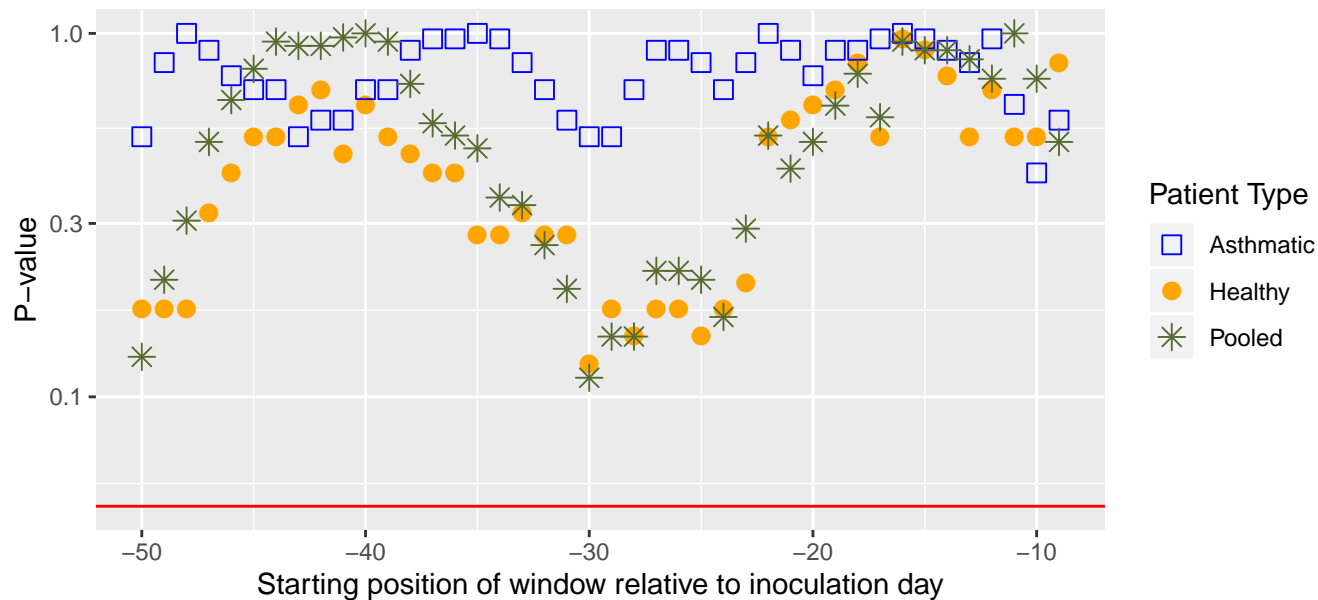

S18B

## Evening Normalized FEV1/FVC, area under ROC curve

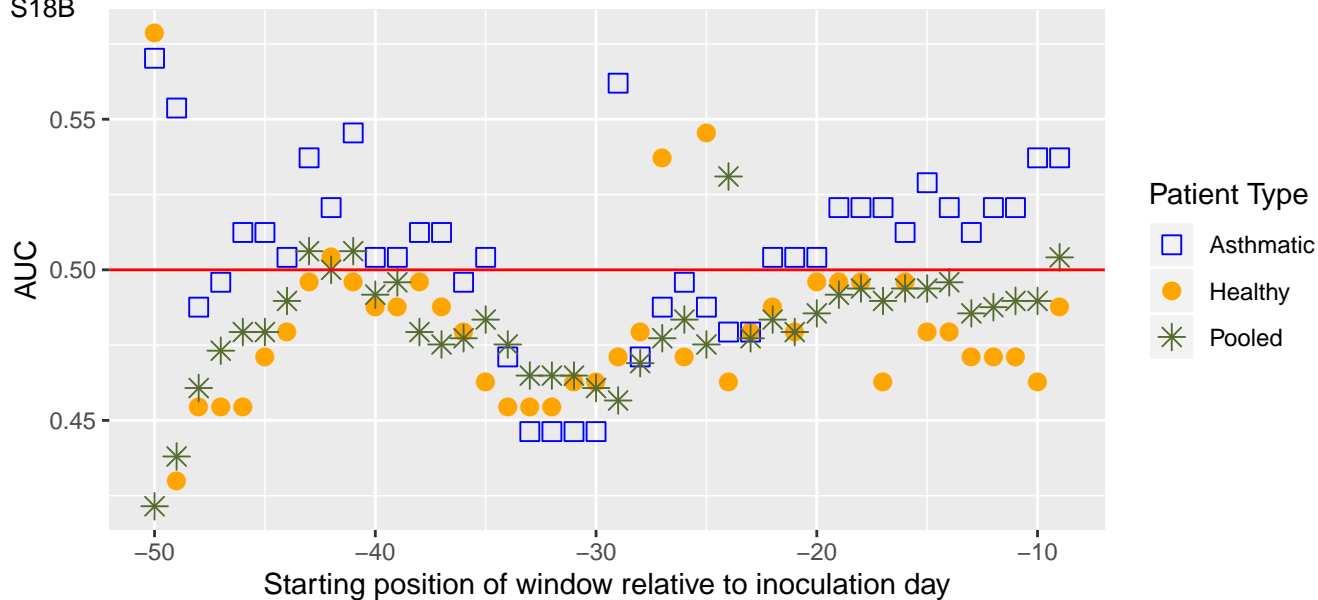

S19A

## Evening Normalized FVC, P-value

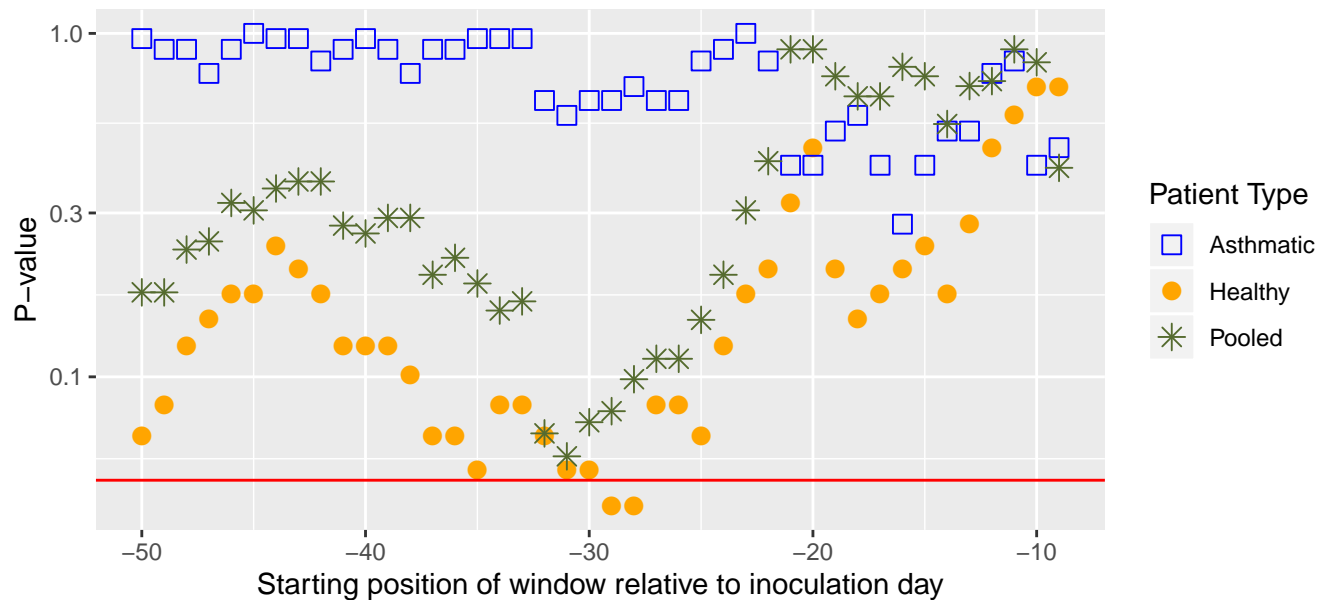

S19B

## Evening Normalized FVC, area under ROC curve

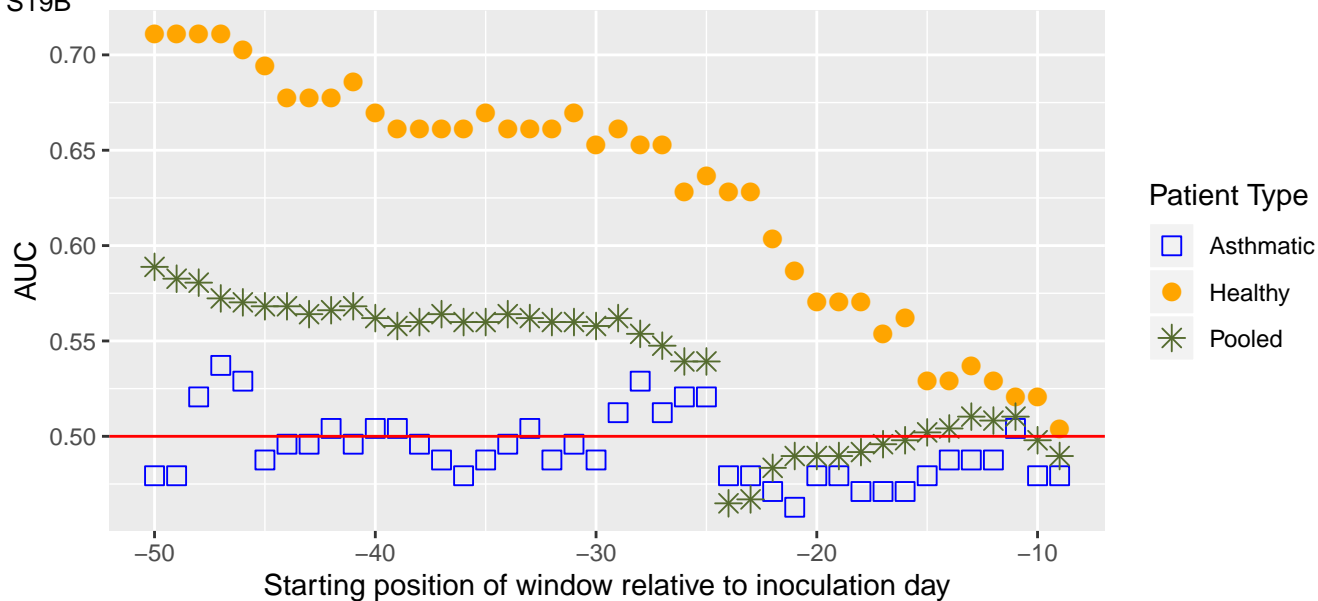

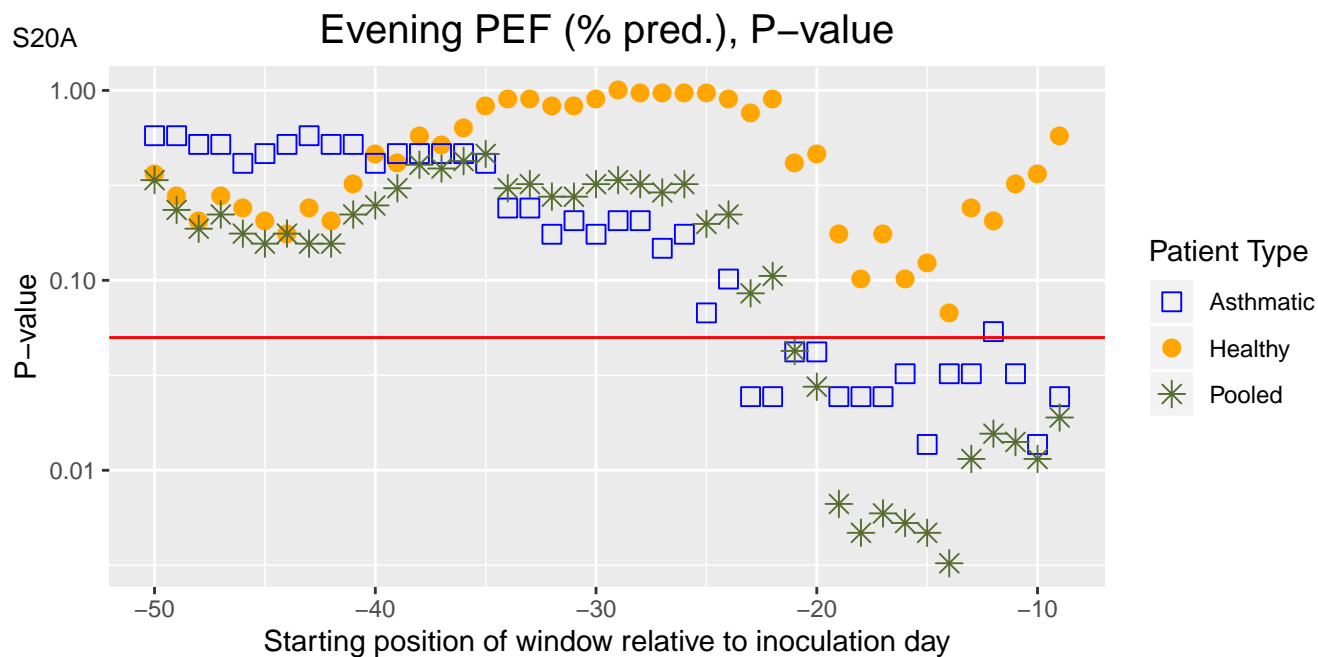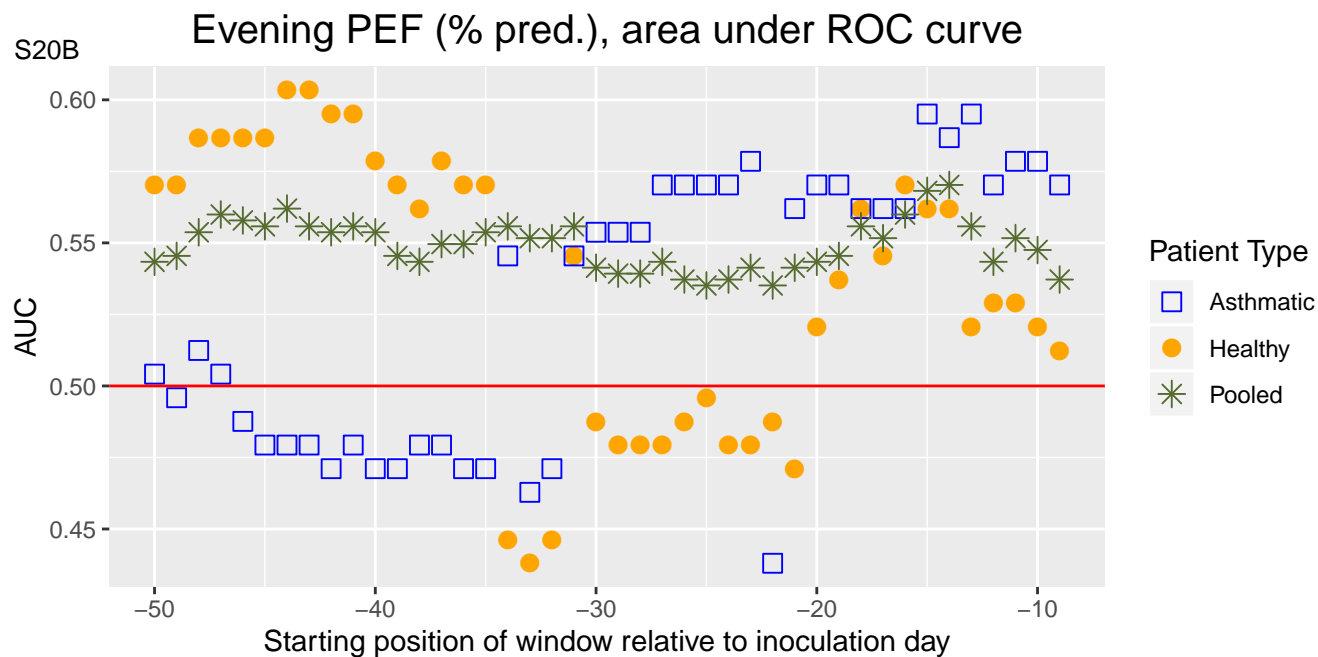

Supplement: s1 [file s1]
